# Supplementary material for: Comparative Genomics Provides Etiologic and Biological Insight into Melanoma Subtypes
Source: PubMed Central journal article supplement — Cancer Discov. 2022 Sep 13;12(12):2856–79. doi: 10.1158/2159-8290.CD-22-0603 (PMC9716259; doi:10.1158/2159-8290.cd-22-0603), 2022-09-13
Supplement: cd-22-0603_supp7.pdf [file cd-22-0603_supp7.pdf]

**Supplementary Tables S7 and S8**

**Supplementary Table S7. Univariable regression of overall-survival (OS) using cutaneous or acral melanoma patients - only factors with a significant association with at least 1 subtype are displayed**

**Supplementary Table S8. Criteria for gene aberrations in pathway**

**Supplementary Table S7. Univariable regression of overall-survival (OS) using cutaneous or acral melanoma patients - only factors with a significant association with at least 1 subtype are displayed**

| Variable                          | Variable | Cutaneous      |         | Variable | Acral           |         |
|-----------------------------------|----------|----------------|---------|----------|-----------------|---------|
|                                   |          | HR             | P-value |          | HR              | P-value |
| <b>Ulceration</b>                 |          |                |         |          |                 |         |
| No                                | 157      | 1              | <.001   | 36       | 1               | 0.048   |
| Yes                               | 81       | 2.4 (1.6, 3.7) |         | 43       | 2.0 (1.0, 4.1)  |         |
| <b>Mitotic rate</b>               |          |                |         |          |                 |         |
| 0                                 | 22       | 1              | <.001   | 4        | 1               | 0.191   |
| 1-5                               | 106      | 1.5 (0.7, 3.4) |         | 41       | 1.4 (0.3, 6.0)  |         |
| >=6                               | 108      | 3.5 (1.6, 7.6) |         | 35       | 2.4 (0.5, 11.0) |         |
| <b>Lymphovascular invasion</b>    |          |                |         |          |                 |         |
| No                                | 188      | 1              | 0.003   | 56       | 1               | 0.882   |
| Yes                               | 26       | 2.5 (1.4, 4.7) |         | 17       | 0.9 (0.4, 2.3)  |         |
| <b>Measure of telomere length</b> |          |                |         |          |                 |         |
| Lower median                      | 142      | 1              | 0.001   | 42       | 1               | 0.318   |
| Upper median                      | 142      | 2.0 (1.3, 3.0) |         | 41       | 1.4 (0.7, 2.7)  |         |
| <b>TCGA category</b>              |          |                |         |          |                 |         |
| BRAF                              | 113      | 1              | 0.374   | 19       | 1               | 0.021   |
| NF1                               | 69       | 1.2 (0.7, 2.0) |         | 21       | 0.6 (0.2, 2.0)  |         |
| RAS                               | 77       | 1.5 (0.9, 2.4) |         | 18       | 3.2 (1.2, 8.6)  |         |
| triple-WT                         | 25       | 1.1 (0.5, 2.5) |         | 25       | 1.6 (0.6, 3.9)  |         |

\*the following parameters were non-significant ( $p \geq 0.05$ ): gender, number of SNVs/indels; number of rearrangements; presence of WGD; presence of complex rearrangements; number of kataegis loci; presence of complex rearrangements on chromosomes 5,6,7,8,11,12, 17 or 22; presence of *TERT* promoter mutations, presence of *CDKN2A* aberrations, presence of *PTEN* aberrations, presence of *KIT* activating mutations, presence of aberrations in MAPK, PI3K, p53, p16 or telomere maintenance pathways; *CCND1*, *CDK4*, *PAK1*, *GAB2* amplifications (tested in AM only); presence of *SPRED1* aberrations (tested in AM only); presence of *TYRP1* aberrations (tested in AM only)

**Supplementary Table S8. Criteria for gene aberrations in pathway**

| <b>Pathway</b> | <b>Gene</b> | <b>Aberrations included</b>                                                                                                 |
|----------------|-------------|-----------------------------------------------------------------------------------------------------------------------------|
| MAPK           | BRAF        | BRAF TCGA category: V600 missense,V601 missense,K597 missense, Fusion                                                       |
| MAPK           | NRAS        | RAS TCGA category: Q61,G12,G13 hotspot                                                                                      |
| MAPK           | KRAS        | RAS TCGA category: Q61,G12,G13 hotspot                                                                                      |
| MAPK           | HRAS        | RAS TCGA category: Q61,G12,G13 hotspot                                                                                      |
| MAPK           | NF1         | NF1 TCGA category: Missense, Nonsense, Nonstop, Splice Site, Frameshift indel, Inframe indel, LOH*, Homozygous deletion, SV |
| MAPK           | SPRED1      | Missense, Nonsense, Nonstop, Splice Site, Frameshift indel, Inframe indel, LOH*, Homozygous deletion, SV                    |
| MAPK           | KIT         | Missense or inframe indel                                                                                                   |
| MAPK           | MAP2K1      | Codon 124, 125, 203 hotspot                                                                                                 |
| MAPK           | MAP2K2      | Codon 124, 125, 203 hotspot - none found so not shown in figure                                                             |
| MAPK           | RAF1        | Fusion                                                                                                                      |
| MAPK           | RAC1        | P29S hotspot                                                                                                                |
| MAPK           | ROS1        | Fusion                                                                                                                      |
| MAPK           | ALK         | Fusion                                                                                                                      |
| MAPK           | MET         | Fusion                                                                                                                      |
| PI3K           | NRAS        | RAS TCGA category: Q61,G12,G13 hotspot                                                                                      |
| PI3K           | KRAS        | RAS TCGA category: Q61,G12,G13 hotspot                                                                                      |
| PI3K           | HRAS        | RAS TCGA category: Q61,G12,G13 hotspot                                                                                      |
| PI3K           | NF1         | NF1 TCGA category: LOH*, Homozygous deletion, Missense, Nonsense, Nonstop, Splice Site, Frameshift indel, Inframe indel, SV |
| PI3K           | SPRED1      | LOH*, Homozygous deletion, Missense, Nonsense, Nonstop, Splice Site, Frameshift indel, Inframe indel, SV                    |
| PI3K           | PTEN        | LOH*, Homozygous deletion, Missense, Nonsense, Nonstop, Splice Site, Frameshift indel, Inframe indel, SV, Nonsense germline |
| PI3K           | AKT1        | E17 hotspot                                                                                                                 |
| PI3K           | AKT2        | E17 hotspot - none found so not shown in figure                                                                             |

|                |              |                                                                                                                                                     |
|----------------|--------------|-----------------------------------------------------------------------------------------------------------------------------------------------------|
| PI3K           | AKT3         | E17 hotspot - none found so not shown in figure                                                                                                     |
| PI3K           | PIK3CA       | All cooccur with BRAF/NRAS so not shown in figure                                                                                                   |
| PI3K           | KIT          | Missense or inframe indel                                                                                                                           |
| PI3K           | ROS1         | Fusion                                                                                                                                              |
| PI3K           | ALK          | Fusion                                                                                                                                              |
| PI3K           | MET          | Fusion                                                                                                                                              |
| p53            | TP53         | LOH*, Homozygous deletion, Missense, Nonsense, Nonstop, Splice Site, Frameshift indel, Inframe indel, SV                                            |
| p53            | MDM2         | Amplification                                                                                                                                       |
| p53            | CDKN2A (p14) | Missense, Nonsense, Nonstop, Splice Site, Frameshift indel, Inframe indel, LOH*, Homozygous deletion, SV                                            |
| p16/Cell cycle | CDKN2A (p16) | Missense, Nonsense, Nonstop, Splice Site, Frameshift indel, Inframe indel, LOH*, Homozygous deletion, SV, Methylation, Missense pathogenic germline |
| p16/Cell cycle | RB1          | Missense, Nonsense, Nonstop, Splice Site, Frameshift indel, Inframe indel, LOH*, Homozygous deletion, SV, Methylation                               |
| p16/Cell cycle | CDK4         | Amplification, Hotspot Missense codon 24                                                                                                            |
| p16/Cell cycle | CCND1        | Amplification                                                                                                                                       |
| Telomere       | TERT         | Promoter, Amplification, SV within 20 upstream of start site, Germline promoter                                                                     |
| Telomere       | ATRX         | LoF mutations: Nonsense, Nonstop, Splice Site, Frameshift indel, SV                                                                                 |
| Telomere       | POT1         | LoF mutations: Nonsense, Nonstop, Splice Site, Frameshift indel, Homozygous deletion, SV                                                            |

\*LOH for the tumour suppressor genes was included to consider the possibility of

haploinsufficiency
